# Supplementary material
Source: publisher figshare collection journal article supplement (https://sage.figshare.com/ndownloader/files/22213923)
Supplement: Supplementary file 1 [file 22213923]

# ***SHUNNING RESEARCH STUDY***

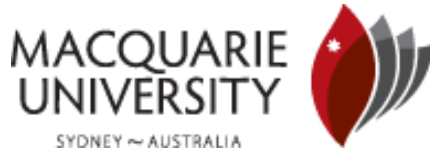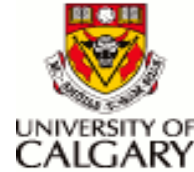

***Would you like to share your experiences with shunning with researchers who study personal relationships?***

**The purpose of this anonymous, online study is to explore ex-Church members' experiences leading up to and in the aftermath of ex-communication/leaving the Church.**

**To participate you must: (a) be 18 years of age or older, (b) have been expelled by or otherwise have decided to leave the Church), and (c) be able to read and write in English.**

**Please share this ad with others who may be interested.**

**[to complete the survey, please click here](#)**

We appreciate your support of this important research! This study is joint venture between the Department of Psychology at Macquarie University (Australia) and the Department of Psychology at the University of Calgary (Canada) and has been approved by the University of Calgary's Conjoint Research Ethics Committee and the Macquarie University Human Ethics Committee. Neither the researchers nor any aspect of this research are affiliated with the XXXX Church.

*For more information, please contact Dr. Susan Boon ([sdboon@ucalgary.ca](mailto:sdboon@ucalgary.ca)) or Dr. Jac Brown ([jac.brown@mq.edu.au](mailto:jac.brown@mq.edu.au))*
